# Supplementary material
Source: Springer Nature journal article supplement (https://www.springermedizin.de/resource/supplementary/12913_2013_3198_MOESM1_ESM.pdf/9532662)
Supplement: MOESM1 [file 9532662]

## Focus Group Discussion Guide: Nurse Mentees

| Code                                        | Definition                                                                                                                               |
|---------------------------------------------|------------------------------------------------------------------------------------------------------------------------------------------|
| <b>1. IMCI definition</b>                   |                                                                                                                                          |
| 1.1. Care and treatment                     | Integrated or comprehensive management of childhood illness( below the age of five)                                                      |
| 1.2. Satisfaction                           | Satisfy the needs of the mother who brings in their child by giving a correct treatment                                                  |
| 1.3. Counseling                             | Advice to mothers about their child's life, feeding practices or their own reproductive health                                           |
| <b>2. MESH description</b>                  |                                                                                                                                          |
| 2.1. Friends                                | Working together at health centers, humble, receptive making corrections without rephending.                                             |
| 2.2. Reminders                              | Help out and remind them when something cases are difficult to handle                                                                    |
| 2.3. Trainers                               | Inform there are latest changes in the IMCI guidelines, and/or things that didn't change                                                 |
| 2.4. Improve quality                        | Observing the actual quality of care and observe challenges and help to improve                                                          |
| 2.5. Exchange                               | Discuss on different ideas and get inputs. Consider ideas my ideas as valuable too.                                                      |
| 2.6. Knowledge                              | Improve some one's knowledge and intellectual capacity                                                                                   |
| 2.7. Feedback                               | Summarizing or telling what when well and what went bad and show what has to be done and how and encouraging to continue doing well      |
| 2.8. Keep contact                           | Keep the correspondence on complicated cases even during the time there is no physical presence. Through the phone                       |
| 2.9. Refresher training                     | Need to re-training and provide updates on new protocols                                                                                 |
| 2.10. Equipment and supplies                | Direct provision of materials or advocacy to equip health centers including registers, case management recording forms, medications etc. |
| <b>3. Communication&amp; Skill-Building</b> |                                                                                                                                          |
| 3.1. Knowledge assessment                   | Ability to discover where needs a support./gaps through observation and checklists                                                       |
| 3.2. Support                                | Helping or providing support to manage complicated cases by helping or responding to difficult questions                                 |
| 3.3. Relationship                           | Agreeing and accepting when there are difficult situation. Talk to people and care on what they tell him                                 |
| 3.4. Paperwork                              | Difficulties due to different registers and report to be filled out                                                                      |
| 3.5. Dosing tools                           | Inconsistency of dosing materials; especially spoons                                                                                     |
| 3.6. Patient flow                           | An increase of the number of patients associated with difficulties to do any more activities                                             |
| 3.7. Customer care                          | Ability to interact with client, essentially marked by saluting and do an identification before anything else                            |
| 3.8. Comfortable                            | Possibility to speak and/or ask question easily when is necessary                                                                        |
| 3.9. Respect                                | Answer questions and collaborate without undermining                                                                                     |

|                                                              |                                                                                                                                                                                                                            |
|--------------------------------------------------------------|----------------------------------------------------------------------------------------------------------------------------------------------------------------------------------------------------------------------------|
| 3.10.Scare                                                   | Cause fear to someone.<br>Intimidating or reprimanding, terrorizing                                                                                                                                                        |
| 3.11.Special                                                 | Particular aspects that mentors have that is unique to them. Which you can't get with traditional supervision                                                                                                              |
| 3.12.Introduction                                            | Description of personal identification humbly and comprehensively.<br>Mentioning your role without imposing                                                                                                                |
| 3.13.Schedule sharing                                        | Gaps in sharing schedules prior the mentoring visit                                                                                                                                                                        |
| 3.14.Active listening                                        | Good listening and supported by follow up                                                                                                                                                                                  |
| 3.15.Positive perception                                     | A neutral judgment especially even when you would be in a mistake                                                                                                                                                          |
| <b>4. Mentoring vs.traditional supervision</b>               |                                                                                                                                                                                                                            |
| 4.1. Bad collaboration                                       | Clinical IMCI and community IMCI. This reflect a area of improvement                                                                                                                                                       |
| 4.2. Missing appointment                                     | Children who don't show up while he/she or the caregiver got a rendez-vous to get back to the health center                                                                                                                |
| 4.3. Inspection                                              | Reaching health centers and observe what is done well or bad having intention to reprimand rather than supporting and coaching                                                                                             |
| 4.4. Projection                                              | Using projector and videos to train and demonstrate danger signs and management of cases                                                                                                                                   |
| <b>5. Barriers to IMCI delivery &amp; MESH contributions</b> |                                                                                                                                                                                                                            |
| 5.1. Initial training                                        | Need of didactic trainings in IMCI to fill the gaps                                                                                                                                                                        |
| 5.2. Refresher training                                      | A training aiming to provide updates on IMCI protocols and/guidelines                                                                                                                                                      |
| 5.3. Organization and Scheduling                             | Organizational problem that makes IMCI less effective especially in deploying nurses. Misalignment between training background and clinical assignment                                                                     |
| 5.4. Paperwork and reporting                                 | All constraints related to the length of forms filled out by nurses and other clinical reports that nurses are required to fill out                                                                                        |
| 5.5. Misalignment                                            | Discordance between clinical responsibility and training background. IMCI trained nurses appointed other tasks other than IMCI consults                                                                                    |
| 5.6. Stock out                                               | Lack of one or more essential IMCI medicine at both health center and district pharmacy                                                                                                                                    |
| 5.7. Attrition                                               | Trained personnel leave to other provinces or countries looking for access to good wages and other reasons of lack of motivation                                                                                           |
| 5.8. IMCI rooms                                              | Consultation room availability at health centers                                                                                                                                                                           |
| 5.9. Infrastructure                                          | Problem with IMCI related equipment and infrastructure such as rooms etc.                                                                                                                                                  |
| 5.10.Protocol and patient charts                             | Sources and effort to supply equipment to health center IMCI clinics                                                                                                                                                       |
| 5.11.Active IMCI clinic                                      | A clinic running at least 5 days per week despite other challenges mentioned                                                                                                                                               |
| 5.12.Education level                                         | Low education level, most of IMCI trained nurses are A2 which limits them to further understanding limiting mentoring effectiveness                                                                                        |
| 5.13.Academ_deviation                                        | Nurses always like to continue with their studies and decide to study whatever they want (other than nursing)                                                                                                              |
| 5.14.Performance-based financing                             | All reasons related to incentives provided by the ministry of health                                                                                                                                                       |
| 5.15.IMCI implementation                                     | MESH program facilitated the implementation of IMCI at health centers. This is an implementation that was delayed for different reasons. Example: No IMCI clinical despite the initial training that hc nurses had gotten. |

|                                       |                                                                                                                                |
|---------------------------------------|--------------------------------------------------------------------------------------------------------------------------------|
| 5.16.Assessment                       | Whatever activities to assess gaps leading to setting potential intervention to improve IMCI quality of care at health centers |
| <b>6. Acceptability and expansion</b> |                                                                                                                                |
| 1.1. Acceptability and expansion      | Argument or reaction to support MESH program acceptability and expansion                                                       |
